# Supplementary material for: Identification of alanine aminotransferase 1 interaction network via iTRAQ-based proteomics in alternating migration, invasion, proliferation and apoptosis of HepG2 cells
Source: publisher site journal article supplement (doi:10.18632/aging.204286), 2022-09-14
Supplement: Supplementary file [file aging-v14i17-204286-supplementary-material-SD1.pdf]

**SUPPLEMENTARY FIGURE**

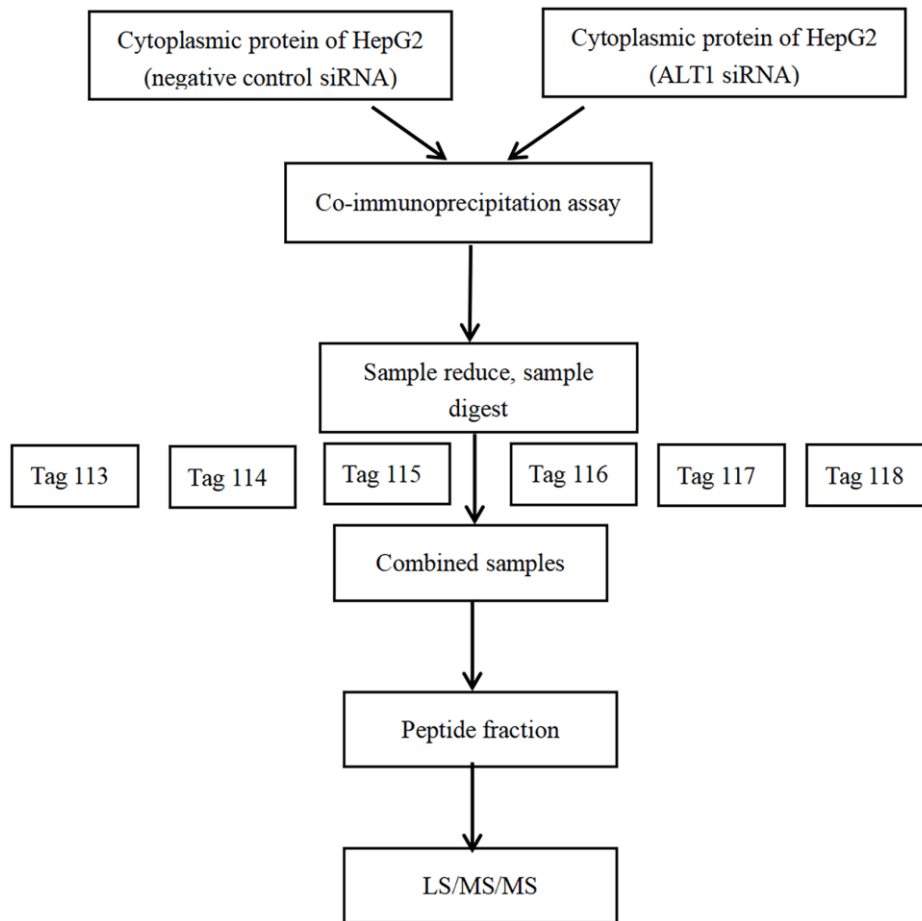

**Supplementary Figure 1. The iTRAQ-based MS workflow.**
